# Supplementary material
Source: Springer Nature journal article supplement (https://www.springermedizin.de/resource/supplementary/13054_2013_2873_MOESM1_ESM.pdf/9714062)

Appendix:  
Multilevel competing risk models  
to evaluate the risk of nosocomial infection  
- Statistical methods and R code -

December 9, 2013

## Statistical methods

### Model 1: Shared frailty models for event-specific hazard rates - the etiology (rate) model

The classical way to analyse competing risks data is to study event-specific hazard rates. We introduce random effects for each ICU by a shared gamma frailty model [1, 2]. Thus, for each event  $k$  (NI, death w/o NI, discharge w/o NI), for the  $j$ -th patient in the  $i$ -th ICU, the event-specific hazard rate with a shared frailty term  $Z_i^k$  is defined as

$$\lambda_{ij}^k(t|Z_i^k) = Z_i^k \lambda_0^k(t) \quad (1)$$

The frailty term  $Z_i^k$  is a random effect which varies across ICUs (patients within ICU share the same frailty) and is assumed to be Gamma distributed with shape parameter  $1/\theta_k$  and inverse scale parameter  $1/\theta_k$ , thus  $E(Z^k) = 1$  and  $Var(Z^k) = \theta_k$ . Large values of  $\theta_k$  signify a closer positive relationship between patients within ICU and greater heterogeneity across ICUs. The baseline hazard for event  $k$  is labeled as  $\lambda_0^k(t)$ .

Observed covariates  $X$  are considered in a multiplicative way as follows

$$\lambda_{ij}^k(t|X_{ij}, Z_i^k) = Z_i^k \lambda_0^k(t) \exp(\beta^k X_{ij}) \quad (2)$$

We consider patient-individual as well as ICU-specific covariates.

### Model 2: Shared frailty model for the subdistribution hazard of NI - the prediction (risk) model

For studying the risk (cumulative incidence function) of NI, we use the Fine and Gray model [3] and introduce a shared frailty structure to investigate heterogeneity in a similar way as Katsahian et al [4]. Thus, we set all event times to time until potential censoring for patients who are discharged and died w/o NI [5]. These times are known because of administrative censoring. Then we fit shared frailty models in analogy to formula 1 and 2 to this modified data set.

Table 1: Hypothetical data. ICU ID=identity code for the ICU, patient ID = identity code for the patient, time=time from admission, to=type of event (1=NI, 2=death without NI, 3=discharge without NI, 0=censored), timepotcens=time from admission to potential censoring, timesubNI=subdistribution time for NI (times of competing events are replaced with timepotcens), left-truncated data should use the start-stop notation

| ICU ID | patient ID | time  | to    | timepotcens | timesubNI | covariates |
|--------|------------|-------|-------|-------------|-----------|------------|
| 1      | 1          | 5     | 1     | 45          | 5         | 0          |
| 1      | 2          | 8     | 3     | 65          | 65        | 1          |
| 1      | 3          | 4     | 2     | 73          | 73        | 1          |
| 1      | 4          | 17    | 1     | 123         | 17        | 1          |
| 1      | 5          | 9     | 3     | 47          | 47        | 0          |
| 1      | 6          | 5     | 3     | 79          | 79        | 0          |
| 2      | 7          | 7     | 3     | 76          | 76        | 1          |
| 2      | 8          | 8     | 3     | 65          | 65        | 1          |
| 2      | 9          | 14    | 1     | 123         | 14        | 1          |
| 2      | 10         | 12    | 2     | 54          | 54        | 0          |
| 2      | 11         | 9     | 1     | 76          | 9         | 0          |
| 2      | 12         | 9     | 0     | 89          | 9         | 1          |
| (...)  | (...)      | (...) | (...) | (...)       | (...)     | (...)      |

## Data analysis

### Software

For all analyses we used the flexible R-package *frailtyPack* [6].

### R code

```
# load the software
library("frailtypack")

# data should look like in table 1
# note that data$timesubNI<-ifelse(data$status==1,data$time,data$timepotcens)

# run model 1 and formula 1 for nosocomial infection using
# semi-parametric hazard functions with the penalized likelihood estimation
model1_NI<-frailtyPenal(Surv(time,to==1) ~ cluster(ICU_id) ,
                        data=data,n.knots=7,kappa1=1000,Frailty=TRUE,cross.validation=TRUE)

# plot baseline hazard
plot(model1_NI)

# plot frailties
plot(model1_NI$frailty.pred)

# print results
```

```

print(model1_NI)
summary(model1_NI)

# perform the same analysis for death without NI by
# replacing Surv(time,to==1) by Surv(time,to==2)

# perform the same analysis for discharge without NI by
# replacing Surv(time,to==1) by Surv(time,to==3)

# Multivariate model
# run model 1 and formula 2 for nosocomial infection using
# semi-parametric hazard functions with the penalized likelihood estimation
model1_NI_multi<-frailtyPenal(Surv(time,to==1) ~ cluster(ICU_id) + covariates ,
                             data=data,n.knots=7,kappa1=1000,Frailty=TRUE,cross.validation=TRUE)

# Subdistribution model
# run model 2 for nosocomial infection using
# semi-parametric hazard functions with the penalized likelihood estimation
model2_NI<-frailtyPenal(Surv(timesubNI,to==1) ~ cluster(ICU_id) ,
                       data=data,n.knots=7,kappa1=1000,Frailty=TRUE,cross.validation=TRUE)

model2_NI_multi<-frailtyPenal(Surv(timesubNI,to==1) ~ cluster(ICU_id) + covariates,
                              data=data,n.knots=7,kappa1=1000,Frailty=TRUE,cross.validation=TRUE)

```

## References

- [1] Liqueur B, Timsit JF, Rondeau V. Investigating hospital heterogeneity with a multi-state frailty model: application to nosocomial pneumonia disease in intensive care units. *BMC Med Res Methodol.* 2012;12:79.
- [2] Rondeau V, Commenges D, Joly P. Maximum penalized likelihood estimation in a gamma-frailty model. *Lifetime Data Anal.* 2003 Jun;9(2):139–153.
- [3] Fine J, Gray RJ. A proportional hazards model for the subdistribution of a competing risk. *J Am Stat Assoc.* 1999;94(446):496–509.
- [4] Katsahian S, Boudreau C. Estimating and testing for center effects in competing risks. *Stat Med.* 2011 Jun;30(13):1608–1617.
- [5] Beyersmann J, Allignol A, Schumacher M. *Competing Risks and Multistate Models with R.* Springer, New York; 2011.
- [6] Rondeau V, Mazroui Y, Gonzalez JR. frailtypack: An R package for the analysis of correlated survival data with frailty models using penalized likelihood estimation or parametrical estimation. *Journal of Statistical Software.* 2012;47(4):1–28.

**Additional information: boxplots of the frailties as an alternative display of the data published in the main manuscript**

Figure 1: Outcome: NB. model 0 - null model, model 1 - with ICU level covariates only, model 2 - with patient level covariates only, model 3 - all covariates

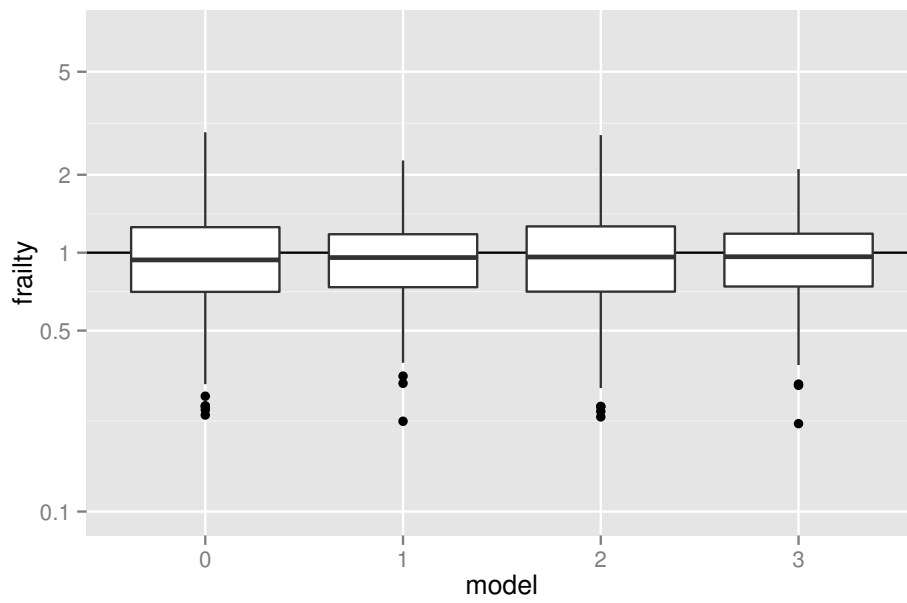

Figure 2: Outcome: death without NB. model 0 - null model, model 1 - with ICU level covariates only, model 2 - with patient level covariates only, model 3 - all covariates

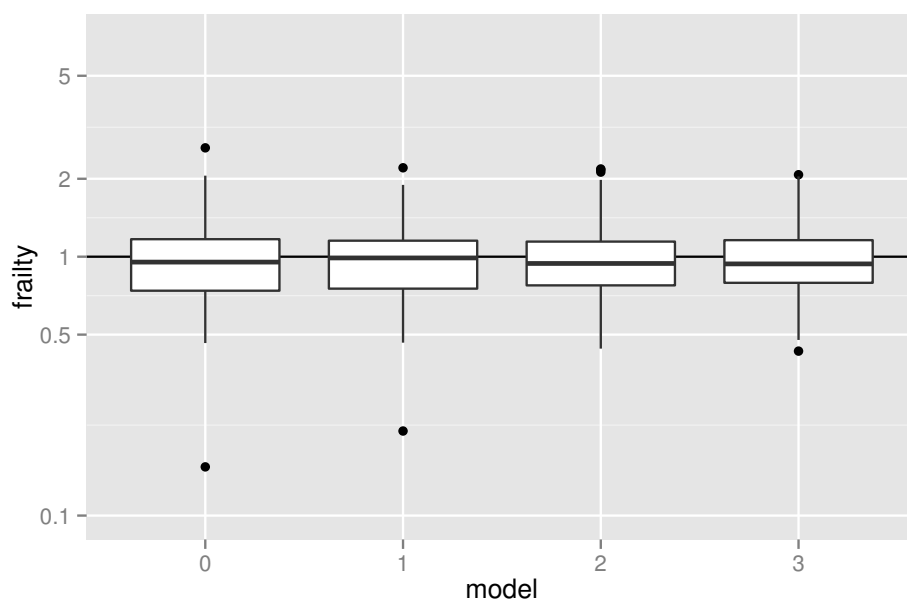

Figure 3: Outcome: discharge without NB. model 0 - null model, model 1 - with ICU level covariates only, model 2 - with patient level covariates only, model 3 - all covariates

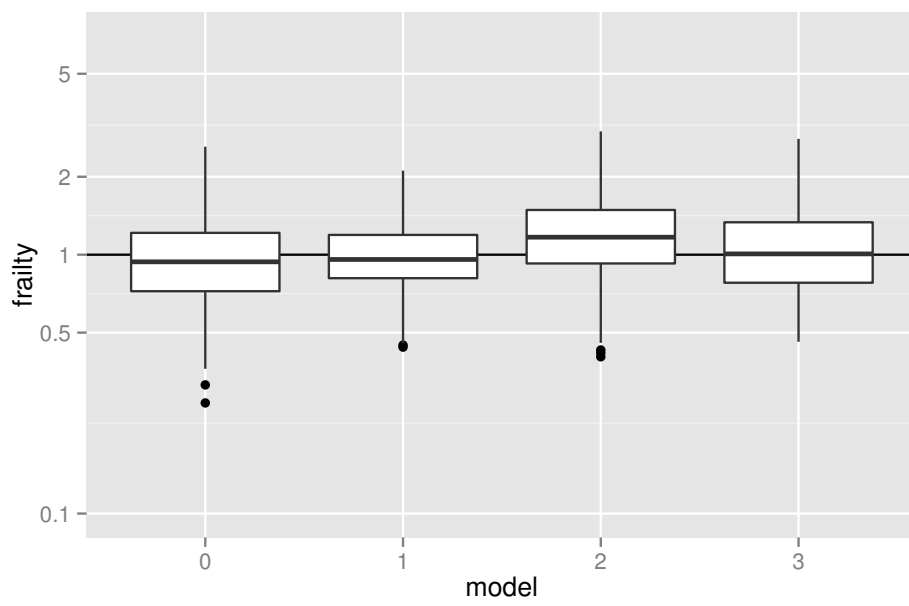

Figure 4: Outcome: NB subdistribution. model 0 - null model, model 1 - with ICU level covariates only, model 2 - with patient level covariates only, model 3 - all covariates

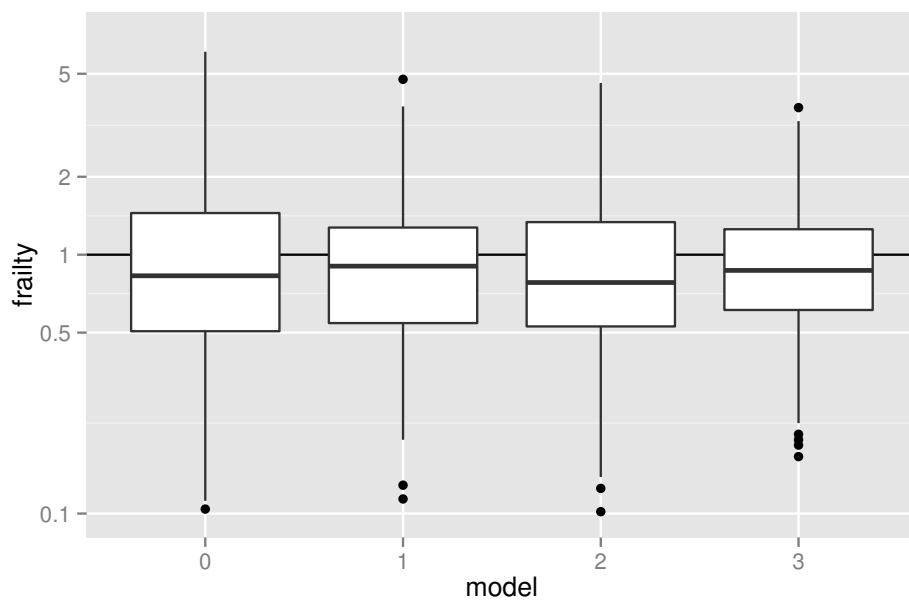

Supplement: MOESM1 [file 9714062]
